# Supplementary material for: The oxidation of pyridines catalyzed by surfactant-encapsulated polyoxometalate [(C18H37)2(CH3)2N]8[HBW11O39] with the temperature-responsive property of solubility
Source: Royal Society of Chemistry journal article supplement (doi:10.1039/c3nj00628j), 2013-01-01
Supplement: c3nj00628j.pdf [file c3nj00628j.pdf]

## Supporting Information for:

### The oxidation of pyridines catalyzed by surfactant-encapsulated polyoxometalate of [(C<sub>18</sub>H<sub>37</sub>)<sub>2</sub>(CH<sub>3</sub>)<sub>2</sub>N]<sub>8</sub>[HBW<sub>11</sub>O<sub>39</sub>] with temperature-responsive property of solubility

Wei Zhao<sup>a\*</sup>, Chunxia Yang<sup>a</sup>, Yong Ding<sup>b\*</sup>, Baochun Ma<sup>b</sup>

<sup>a</sup> College of Chemistry and Pharmaceutical Engineering, Nanyang Normal University, Nanyang 473061, China

<sup>b</sup> Key Laboratory of Nonferrous Metals Chemistry and Resources Utilization of Gansu Province, State Key Laboratory of Applied Organic Chemistry and College of Chemistry and Chemical Engineering, Lanzhou University, Lanzhou 730000, China.

| <b>Contents:</b>                                                        | <b>Pages</b> |
|-------------------------------------------------------------------------|--------------|
| 1. Experimental                                                         | 2            |
| 2. IR spectrum of SEP-BW <sub>11</sub>                                  | 2            |
| 3. <sup>1</sup> H NMR and <sup>13</sup> C NMR of SEP-BW <sub>11</sub>   | 3            |
| <u>4. IR spectrum of the used catalyst</u>                              | <u>4</u>     |
| <u>5. <sup>1</sup>H NMR and <sup>13</sup>C NMR of the used catalyst</u> | <u>4-5</u>   |
| 6. XRD pattern of SEP-BW <sub>11</sub>                                  | 5-6          |
| 7. Characterization of oxidation products                               | 6-7          |
| 8. References                                                           | 7            |

## 1. Experimental

### 1.1 Reagents

All chemicals were analytical grade, commercially available and used without further purification unless otherwise stated.

### 1.2 Characterization techniques

Infrared spectra were recorded on a Nicolet 170 FT-IR spectrometer using KBr pellets. Chemical elemental analysis of the catalysts was done on an ICP-atomic emission spectrometer (Vario EL Cube). XRD data were collected on a Bruker D8-advance with Cu-K $\alpha$  radiation. The TG analysis was performed on a Perkin-Elmer 7 thermal analysis instrument in flowing N<sub>2</sub> with a heating rate of 10K min<sup>-1</sup> from 25 to 1000°C. <sup>1</sup>H NMR and <sup>13</sup>C NMR spectra were recorded on a Bruker AVANCE  $\square$ -400 MHz spectrometer with TMS as an internal standard and CDCl<sub>3</sub> as solvent.

## 2. IR spectrum of SEP-BW<sub>11</sub>

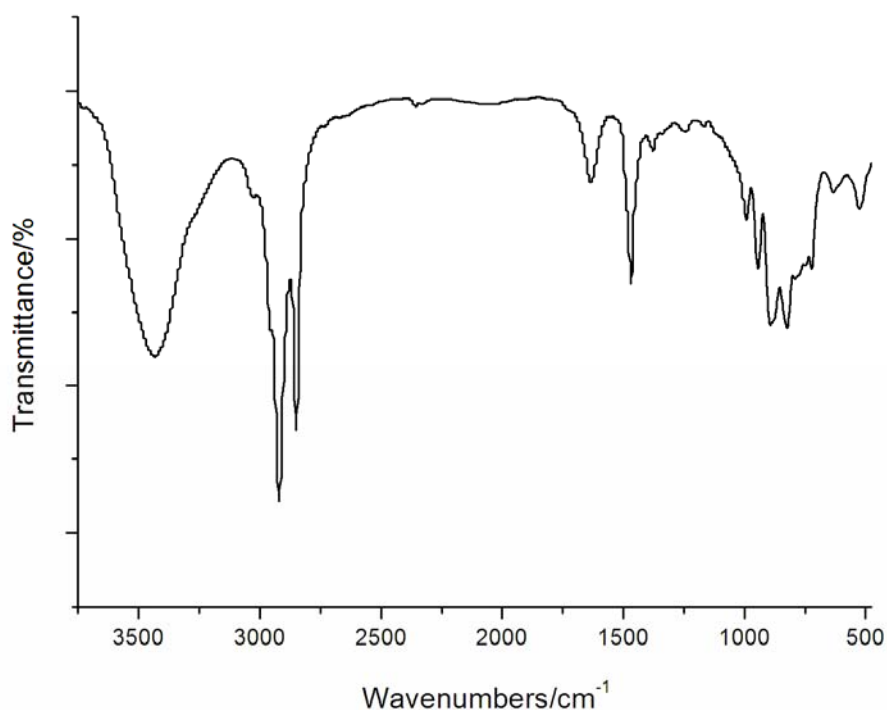

Fig. S1 IR spectrum of SEP-BW<sub>11</sub>

### 3. $^1\text{H}$ NMR and $^{13}\text{C}$ NMR of SEP-BW<sub>11</sub>

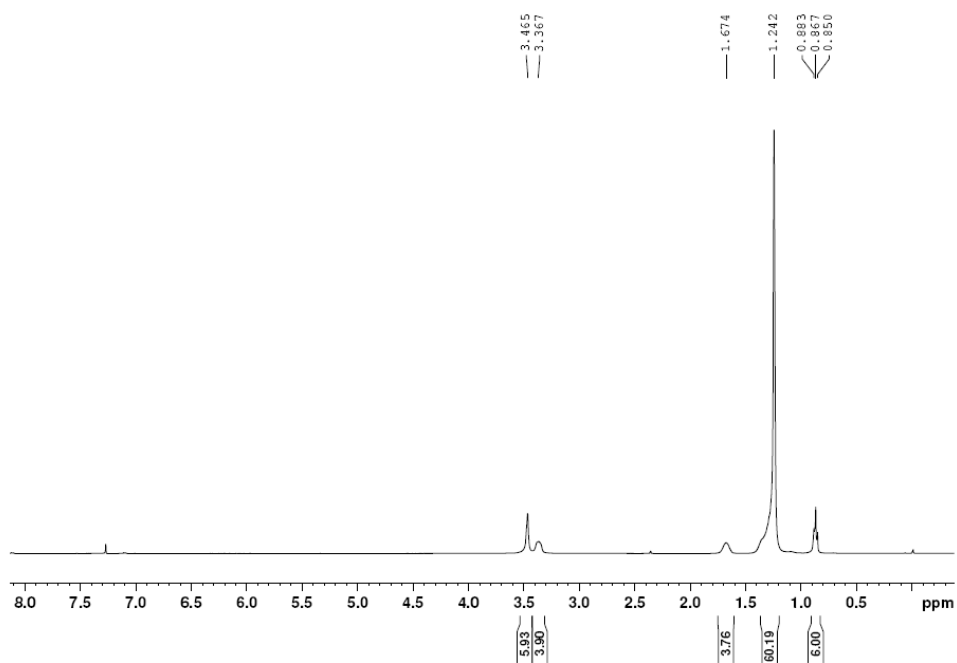

Fig. S2  $^1\text{H}$  NMR of SEP-BW<sub>11</sub>

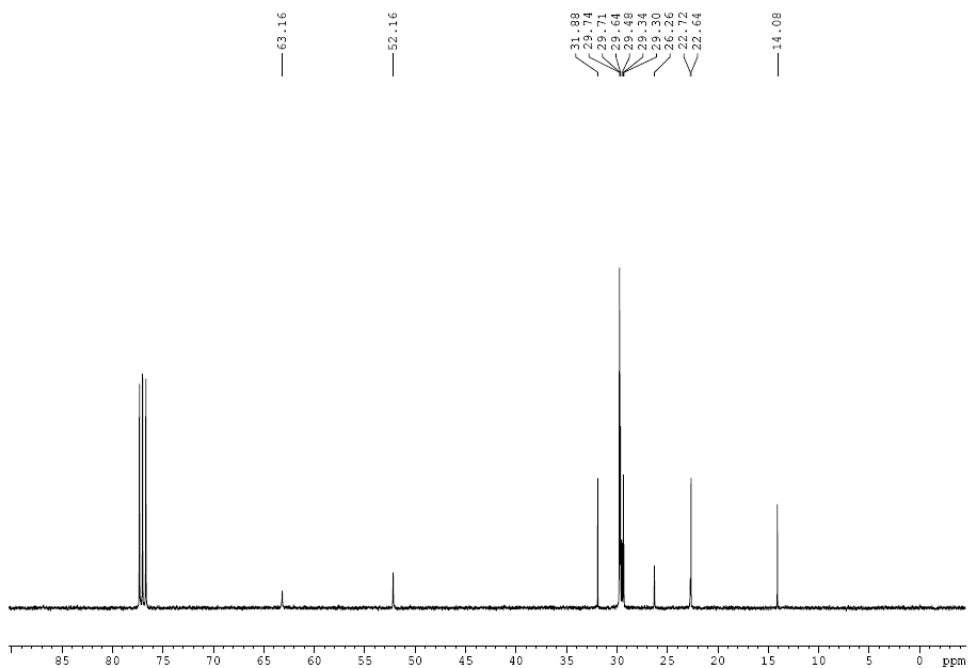

Fig. S3  $^{13}\text{C}$  NMR of SEP-BW<sub>11</sub>

#### 4. IR spectrum of the used catalyst

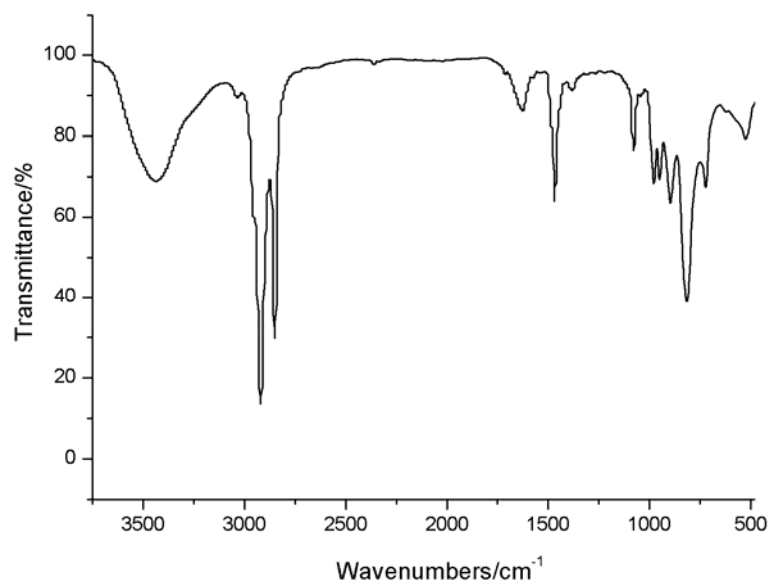

Fig. S4 IR spectrum of the used catalyst

#### 5. <sup>1</sup>H NMR and <sup>13</sup>C NMR of the used catalyst

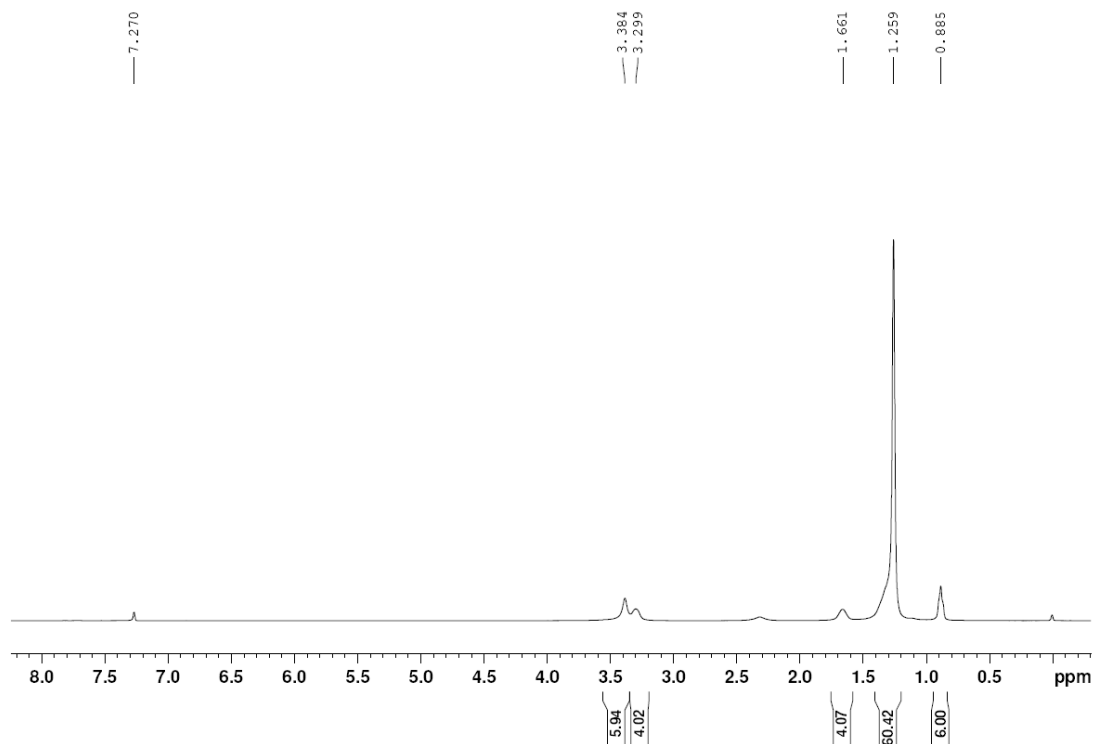

Fig. S5 <sup>1</sup>H NMR of the used catalyst

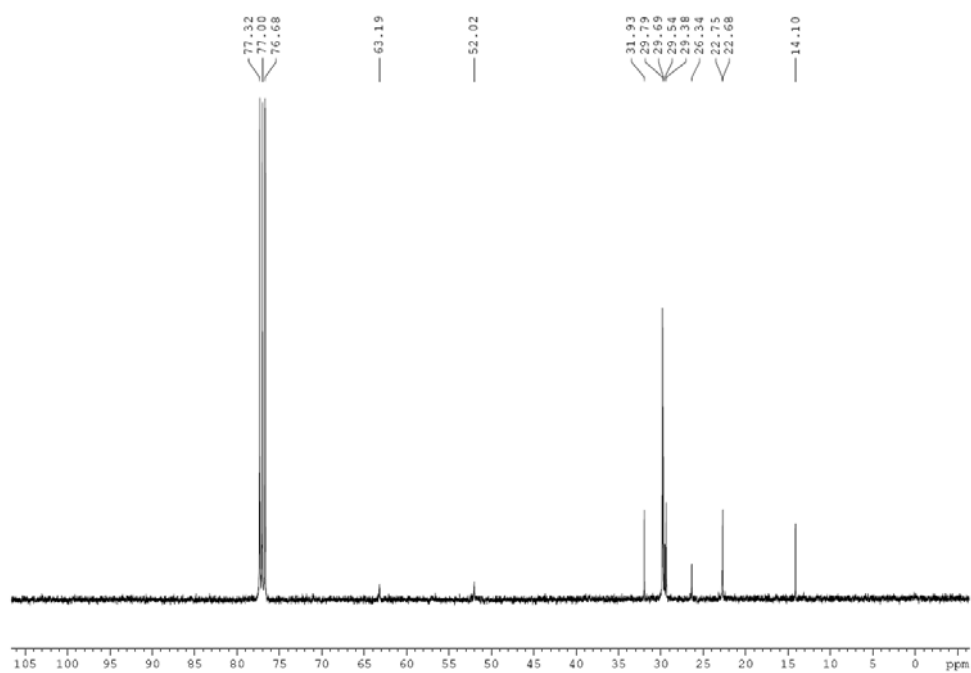

Fig. S6  $^{13}\text{C}$  NMR of the used catalyst

## 6. XRD pattern of SEP-BW<sub>11</sub>

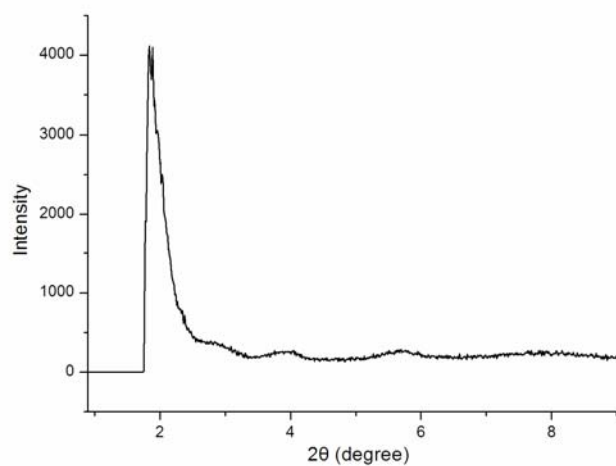

Fig. S7 Low-angle XRD pattern of SEP-BW<sub>11</sub>

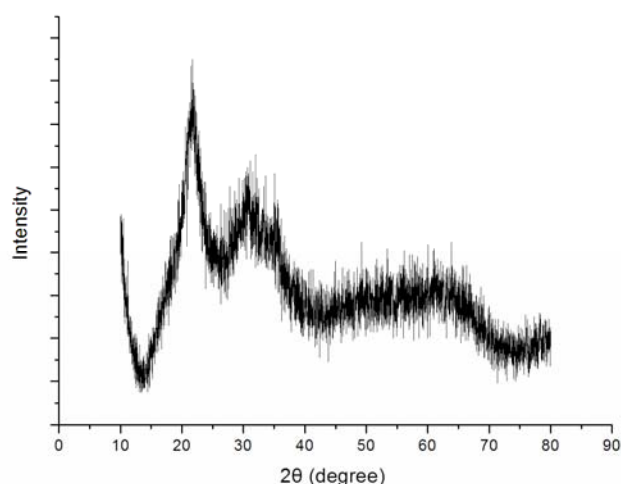

Fig. S8 Wide-angle XRD pattern of SEP-BW<sub>11</sub>

## 7. Characterization of oxidation products <sup>[1-4]</sup>

### Pyridine-N-oxide

<sup>1</sup>H NMR (DMSO-*d*<sub>6</sub>, 400 MHz) δ 8.22-8.21 (d, J=4 Hz, 2 H), 7.44-7.41 (t, 2 H), 7.37-7.33 (t, 1 H); <sup>13</sup>C NMR(DMSO-*d*<sub>6</sub>, 400 MHz) δ 125.7 (2C), 126.9, 139.0 (2C).

### 2-Picoline-N-oxide

<sup>1</sup>H NMR (CDCl<sub>3</sub>, 400 MHz) δ 8.17-8.15 (d, J=8 Hz, 1 H), 7.18-7.16 (d, J=8 Hz, 1 H), 7.12-7.04 (m, 2 H), 2.41 (s, 3 H); <sup>13</sup>C NMR(CDCl<sub>3</sub>, 400 MHz) δ 17.6, 123.4, 125.6, 126.4, 139.1, 148.8.

### 2,3-Lutidine-N-oxide

<sup>1</sup>H NMR (CDCl<sub>3</sub>, 400 MHz) δ 8.24 (s, 1 H), 7.03-6.99 (t, 2H), 2.47 (s, 3H), 2.29 (s, 3H); <sup>13</sup>C NMR(CDCl<sub>3</sub>, 400 MHz) δ 13.8, 19.4, 121.9, 127.6, 134.8, 137.3, 148.4.

### 2,6-Lutidine-N-oxide

<sup>1</sup>H NMR (CDCl<sub>3</sub>, 400 MHz) δ 7.15-7.13 (d, J=8 Hz, 1 H), 7.10-7.06 (m, 2 H), 2.52 (s, 6 H); <sup>13</sup>C NMR(CDCl<sub>3</sub>, 400 MHz) δ 18.3 (2C), 124.0 (2C), 125.0, 149.0 (2C).

### 2-Chloropyridine-N-oxide

<sup>1</sup>H NMR (CDCl<sub>3</sub>, 400 MHz) δ 8.30 (d, 1 H), 7.47-7.45 (t, 1 H), 7.20-7.18 (t, 2 H); <sup>13</sup>C NMR(CDCl<sub>3</sub>, 400 MHz) δ 123.9, 126.0, 127.1, 140.5, 141.8.

### Quinoline-N-oxide

<sup>1</sup>H NMR (CDCl<sub>3</sub>, 400 MHz) δ 8.74-8.72 (d, J=8 Hz, 1 H), 8.53-8.52 (d, J=4 Hz, 1 H), 7.87-7.85 (d,

J=8 Hz, 1 H), 7.75-7.73 (d, J=8 Hz, 2 H), 7.65-7.61 (t, 1 H), 7.29-7.27 (d, J=8 Hz, 1 H);  $^{13}\text{C}$  NMR( $\text{CDCl}_3$ , 400 MHz)  $\delta$  119.7, 120.9, 126.1, 128.1, 128.7, 130.4 (2C), 135.6, 141.5.

#### Isoquinoline-N-oxide

$^1\text{H}$  NMR ( $\text{CDCl}_3$ , 400 MHz)  $\delta$  8.65 (s, 1 H), 8.00-7.99 (d, J=4 Hz, 1 H), 7.64-7.62 (d, J=8 Hz, 1 H), 7.58-7.52 (m, 2 H), 7.47-7.41 (m, 2 H);  $^{13}\text{C}$  NMR( $\text{CDCl}_3$ , 400 MHz)  $\delta$  124.2, 125.0, 126.7, 128.8, 129.0, 129.5, 129.6, 136.2, 136.9.

#### 4-Methyl-quinoline-N-oxide

$^1\text{H}$  NMR ( $\text{CDCl}_3$ , 400 MHz)  $\delta$  8.79-8.77 (d, J=8 Hz, 1 H), 8.45-8.44 (d, J=4 Hz, 1 H), 7.94-7.92 (d, J=8 Hz, 1 H), 7.73-7.71 (d, J=8 Hz, 1 H), 7.66-7.64 (d, J=8 Hz, 1 H), 7.09 (s, 1 H), 2.63 (s, 3 H);  $^{13}\text{C}$  NMR( $\text{CDCl}_3$ , 400 MHz)  $\delta$  18.2, 120.3, 121.4, 124.6, 128.4, 129.8, 130.0, 134.6, 135.0, 140.9.

#### 8-hydroxy-quinoline-N-oxide

$^1\text{H}$  NMR ( $\text{CDCl}_3$ , 400 MHz)  $\delta$  15.1 (s, 1 H), 8.23-8.20 (m, 1 H), 7.79-7.75 (m, 1 H), 7.49-7.43 (m, 1 H), 7.25-7.21 (m, 2 H), 7.05-7.00 (m, 1 H);  $^{13}\text{C}$  NMR( $\text{CDCl}_3$ , 400 MHz)  $\delta$  114.7, 116.7, 120.3, 129.6, 129.7, 130.5, 132.1, 134.4, 153.8.

## 8. References

- [1] F. A. L. Anet and I. Yavari, *J. Org. Chem.*, 1976, **41**, 3589.
- [2] S. A. Sojka, F. J. Dinan and R. Kolarczyk, *J. Org. Chem.*, 1979, **44**, 307.
- [3] C. Copéret, H. Adolfsson, T.-A. V. Khuong, A. K. Yudin and K. B. Sharpless, *J. Org. Chem.*, 1998, **63**, 1740.
- [4] Y. Ding, W. Zhao, W. F. Song, Z. X. Zhang and B. C. Ma, *Green Chem.*, 2011, **13**, 1486.
